# Supplementary material for: Automated chest-radiography as a triage for Xpert testing in resource-constrained settings: a prospective study of diagnostic accuracy and costs
Source: PubMed Central journal article supplement (PMC4515744; doi:10.1038/srep12215), 2015-07-27
Supplement: srep12215-s1.pdf [file srep12215-s1.pdf]

## Automated chest-radiography as a triage for Xpert testing in resource-constrained settings: a prospective study of diagnostic accuracy and costs

R.H.H.M. Philipsen, C.I. Sánchez, P. Maduskar, J. Melendez, L. Peters-Bax, J.G. Peter, R. Dawson, G. Theron, K. Dheda, and B. van Ginneken

Table S1 shows the cost estimates for the GeneXpert MTB/RIF (Xpert) test. A depreciation period of 5 years is assumed and the average costs per cartridge are calculated based on a usage of 5 years. The cost for one Xpert test is \$13.06. The costs for automated chest radiography (ACR) are summarized in Table S2. A depreciation period of 10 years is assumed and the average cost for one ACR is calculated to be \$1.46.

The performance of the CAD4TB v3.07 software, human readers and Xpert test, in terms of area under the receiver operator characteristic curve ( $A_z$ ), using sputum culture reference is shown in Fig S1. The software has  $A_z = 0.79$  and the human readers have  $A_z = 0.76$ ,  $A_z = 0.81$  and  $A_z = 0.77$ , respectively. The sensitivity/specificity of the Xpert test is plotted for reference. Pairwise comparison with bootstrap estimation of the performance of the human readers with the computer software was performed, considering  $p < 0.05$  significant. The performance of all human readers compared to CAD4TB was not significantly different ( $p = 0.91$ ,  $p = 0.11$ ,  $p = 0.70$ , respectively).

Table S1. Cost estimates GeneXpert MTB/RIF<sup>1</sup>

| Row | Category                             | Item                                                              | Cost, number of days, tests or cartridges | Source                        |
|-----|--------------------------------------|-------------------------------------------------------------------|-------------------------------------------|-------------------------------|
| A   | Equipment                            | GeneXpert IV module                                               | US\$ 17 500.00                            | Ref <sup>S1</sup>             |
| B   |                                      | Shipping                                                          | US\$ 1 000.00                             | Ref <sup>S1</sup>             |
| C   |                                      | Power supply unit                                                 | US\$ 1 200.00                             | Ref <sup>S1</sup>             |
| D   |                                      | Printer                                                           | US\$ 200.00                               | Ref <sup>S1</sup>             |
| E   | Maintenance                          | Calibration kit after 1 <sup>st</sup> year                        | US\$ 450.00                               | Ref <sup>S1</sup>             |
| F   |                                      | Annual warranty after 2 <sup>nd</sup> year                        | US\$ 2 900.00                             | Ref <sup>S1</sup>             |
| G   | Consumables                          | Cost per cartridge                                                | US\$ 9.98                                 | Ref <sup>S1</sup>             |
| H   |                                      | Shipment per cartridge                                            | US\$ 1.20                                 | Ref <sup>S1</sup>             |
| I   | Productivity                         | Number of working days per year                                   | 250                                       | Ref <sup>S1,S3</sup>          |
| J   |                                      | Average number of test per instrument per day (year 1)            | 8                                         | Ref <sup>S1,S3</sup>          |
| K   |                                      | Average number of test per instrument per day (year 2 and beyond) | 15                                        | Ref <sup>S1,S3</sup>          |
| L   |                                      | Number of cartridges (year 1)                                     | 2 000                                     | I*J                           |
| M   |                                      | Number of cartridges (year 2 and beyond)                          | 3 750                                     | I * K                         |
| N   | Human resources                      | Annual salary for technician*                                     | US\$ 5 500.00                             | Ref <sup>S2,S3</sup>          |
| O   |                                      | Training and monitoring                                           | US\$ 1 000.00                             | Assumed                       |
| P   | Investment costs: year 1             |                                                                   | US\$ 19 900.00                            | A + B + C + D                 |
| Q   | Running costs: year 1                |                                                                   | US\$ 22 810.00                            | E + (G+H)*L + N + O           |
| R   | Running costs: year 2                |                                                                   | US\$ 44 825.00                            | F + (G+H)*M + N + O           |
| S   | Depreciation period in years         |                                                                   | 5                                         | Assumed                       |
| T   | Average cartridge cost first 5 years |                                                                   | US\$ 13.06                                | (P + Q + (S-1)*R)/(L+(S-1)*M) |

\* Based on 2 hours work needed per day

Table S2. Cost estimates automated chest radiography (ACR)

| Row | Category                        | Item                                  | Cost, number of days or tests | Source                |
|-----|---------------------------------|---------------------------------------|-------------------------------|-----------------------|
| A   | Equipment                       | Direct digital X-ray                  | US\$ 232 452.50               | Ref <sup>S2</sup>     |
| B   |                                 | PACS                                  | US\$ 10 626.40                | Ref <sup>S2</sup>     |
| C   |                                 | Shipment                              | US\$ 3 320.75                 | Ref <sup>S2</sup>     |
| D   |                                 | CAD4TB software                       | US\$ 13 283.00                | Ref <sup>S2</sup>     |
| E   |                                 | Training & TA                         | US\$ 3 320.75                 | Ref <sup>S2</sup>     |
| F   | Running costs                   | Annual maintenance cost               | US\$ 11 290.55                | Ref <sup>S2</sup>     |
| G   |                                 | Annual maintenance and upgrade CAD4TB | US\$ 2 656.60                 | Ref <sup>S2</sup>     |
| H   |                                 | Computer memory                       | US\$ 415.09                   | Ref <sup>S2</sup>     |
| I   |                                 | Power supply                          | US\$ 3 984.90                 | Ref <sup>S2</sup>     |
| J   | Productivity                    | Number of working days per year       | 250                           | Ref <sup>S1-S3</sup>  |
| K   |                                 | Average number of ACR per day         | 200                           | Assumed               |
| L   |                                 | Number of ACR per year                | 50 000                        | J*K                   |
| M   | Human resources                 | Annual salary for technician          | US\$ 27 500.00                | Ref <sup>S2,S3</sup>  |
| N   |                                 | Training and monitoring               | US\$ 1 000.00                 | Assumed               |
| O   | Investment costs                |                                       | US\$ 263 003.40               | A + B + C + D + E     |
| P   | Yearly running costs            |                                       | US\$ 46 847.14                | F + G + H + I + M + N |
| Q   | Depreciation period in years    |                                       | 10                            | Ref <sup>S2</sup>     |
| R   | Average ACR cost first 10 years |                                       | US\$ 1.46                     | (O/Q + P) / L         |

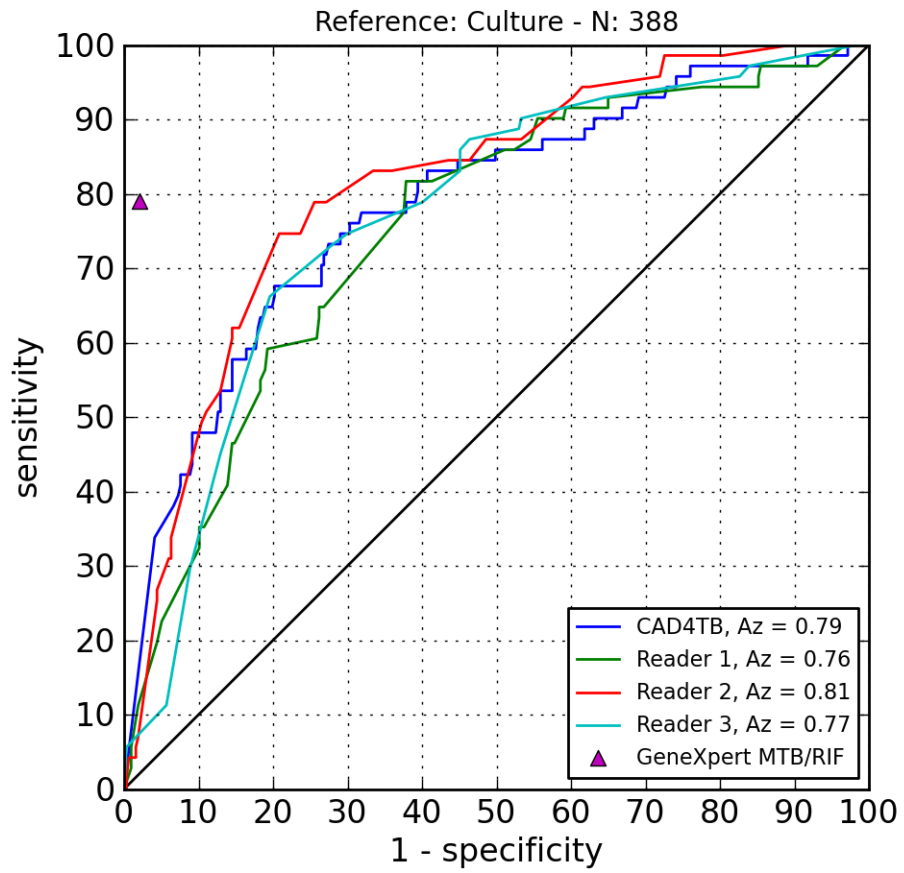

Figure S1. Receiver operating characteristic curves for CAD4TB and human readers. The purple triangle shows the performance of the Xpert test. Culture results are used as reference.

## References

- S1 World Health Organization. Xpert MTB/RIF implementation manual. Available at: [http://apps.who.int/iris/bitstream/10665/112469/1/9789241506700\\_eng.pdf?ua=1](http://apps.who.int/iris/bitstream/10665/112469/1/9789241506700_eng.pdf?ua=1), Accessed June 2014.
- S2 CheckTB! Economics of TB Screening Simulation. Available at: [http://checktb.com/index.php?option=com\\_wrapper&view=wrapper&Itemid=171&lang=en](http://checktb.com/index.php?option=com_wrapper&view=wrapper&Itemid=171&lang=en).
- S3 Theron G, Pooran A, Peter J, van Zyl-Smit R, Mishra HK, Meldau R, et al. Do adjunct TB tests, when combined with Xpert MTB/RIF, improve accuracy and the cost of diagnosis in a resource-poor setting? 2011;40:161–168.
